# Supplementary material for: Factors influencing the choice of surgery as a future career among medical students: a cross- sectional multi-institutional study in Edo State, Nigeria
Source: Research Square preprint supplement (doi:10.21203/rs.3.rs-6306992/v1), 2025-05-09
Supplement: Supplementary file 1 [file 8d3b5543dc071656ad8b5ceb.docx]

Supplementary material 1

**Article title:** Factors influencing the choice of surgery as a future career among medical students: a cross-sectional multi-institutional study in Edo State, Nigeria

**Questionnaire**

**Sociodemographic data**

Age in years: ≤ 20 [ ] 21-22 [ ] 23-24 [ ] 25-26 [ ] 27-28 [ ] 29-30 [ ] ≥ 31 [ ]

Gender: Male [ ] Female [ ]

Marital status: Single [ ] Married [ ] Divorced [ ] Widow [ ]

Medical school: UNIBEN [ ] AAU [ ] EUI [ ]

Year of study: 400L [ ] 500L [ ] 600L [ ]

Previous postings in surgery: General Surgery [ ] Urology [ ] Plastic Surgery [ ] Paediatric Surgery [ ] Neurosurgery [ ] Cardiothoracic Surgery [ ] Orthopaedic Surgery [ ] ENT [ ]

Father’s educational level: None [ ] Primary [ ] Secondary [ ] Tertiary [ ]

Mother’s educational level: None [ ] Primary [ ] Secondary [ ] Tertiary [ ]

Fathers’ profession: Medical [ ] Non-medical [ ]

Mothers’ profession: Medical [ ] Non-medical [ ]

Having a first-degree relation who is a surgeon: Yes [ ] No [ ]. If yes, specify …………………

**Questions on interest in surgery**

Q1. Do you want to specialise in surgery? Yes [ ] No [ ]

If yes, specify the subspecialty: ……………..

If no, specify the field you wish to specialise:…………..

**Questions on factors that influence the choice of future career in surgery**

1-No influence, 2-Slight influence, 3-Moderate influence, 4-Strong influence, 5-Very strong influence

Q2. What factors encouraged you to choose surgery? (to be completed only by those who have indicated an interest in specialising in surgery)

a) Intellectually stimulating/ academic interest: 1 [ ] 2 [ ] 3 [ ] 4 [ ] 5 [ ]

b) Salary/Expected high income: 1 [ ] 2 [ ] 3 [ ] 4 [ ] 5 [ ]

c) Lifestyle of the surgeon: 1 [ ] 2 [ ] 3 [ ] 4 [ ] 5 [ ]

d) Accessible role models/ mentors: 1 [ ] 2 [ ] 3 [ ] 4 [ ] 5 [ ]

e) Having a surgeon as a relative: 1 [ ] 2 [ ] 3 [ ] 4 [ ] 5 [ ]

f) Immediate improvement after surgical intervention/ low mortality rate: 1 [ ] 2 [ ] 3 [ ] 4 [ ] 5 [ ]

g) The social standing and status that the surgeons enjoy 1 [ ] 2 [ ] 3 [ ] 4 [ ] 5 [ ]

h) Practical application of skills: 1 [ ] 2 [ ] 3 [ ] 4 [ ] 5 [ ]

i) Family preference or influence: 1 [ ] 2 [ ] 3 [ ] 4 [ ] 5 [ ]

j) Others ……………….

Q3. What factors discouraged you from choosing surgery? (to be completed only by those who did not choose surgery as a future career)

a) The longer duration of training is a cause for concern: 1 [ ] 2 [ ] 3 [ ] 4 [ ] 5 [ ]

b) Lack of competent surgical training program in the country: 1 [ ] 2 [ ] 3 [ ] 4 [ ] 5 [ ]

c) Lack of role models/ mentors: 1 [ ] 2 [ ] 3 [ ] 4 [ ] 5 [ ]

d) Lifestyle of the surgeon/the long working hours: 1 [ ] 2 [ ] 3 [ ] 4 [ ] 5 [ ]

e) Surgery is a male-dominated field and can be unfriendly to females: 1 [ ] 2 [ ] 3 [ ] 4 [ ] 5 [ ]

f) No academic interest: 1 [ ] 2 [ ] 3 [ ] 4 [ ] 5 [ ]

g) Salary/monetary returns: 1 [ ] 2 [ ] 3 [ ] 4 [ ] 5 [ ]

h) Attitude of senior surgeons/harsh training environment: 1 [ ] 2 [ ] 3 [ ] 4 [ ] 5 [ ]

i) Others …………………
